# Supplementary material for: Identifying Reasons for Nonattendance and Noncompletion of Cardiac Rehabilitation: INSIGHTS FROM GERMANY AND THE NETHERLANDS
Source: PubMed Central journal article supplement — J Cardiopulm Rehabil Prev. 2021 Mar 26;41(3):153–8. doi: 10.1097/HCR.0000000000000580 (PMC8081445; doi:10.1097/hcr.0000000000000580), 2021-03-26
Supplement: jcprh-41-153-s006.pdf [file jcprh-41-153-s006.pdf]

---

# Ein Herz für Zusammenarbeit

---

## Befragung zur kardiologischen Rehabilitation und nachfolgenden Gesundheitsprogrammen

Herzlichen Dank für Ihr Interesse, an unserer Studie teilzunehmen. Mit der Befragung zur kardiologischen Rehabilitation möchten wir herausfinden, welche Faktoren die Teilnahme von Herzpatientinnen und Herzpatienten an Gesundheitsprogrammen - auch nach einer durchgeführten Rehabilitation - beeinflussen. Ihre Antworten sind ein wichtiger Baustein zur Entwicklung von Programmen, um das Risiko eines erneuten Auftretens der Herzprobleme, zu verringern und damit die Lebensqualität zu verbessern.

Bevor Sie mit dem Online-Fragebogen beginnen, möchten wir Sie ausreichend informieren. Sie nehmen an einer Studie im Rahmen des EU-Interreg V-Projektes "Ein Herz für Zusammenarbeit - Kardiologische Rehabilitation" teil.

Projektpartner sind die AOK Rheinland/Hamburg und das Radboudumc\*, das das Projekt wissenschaftlich begleitet. Die ausgefüllten Fragebögen werden daher anonymisiert an Radboudumc weitergeleitet. Es kann keine Verbindung zu Ihrer Person hergestellt werden. Diese Befragung ist freiwillig\*\*.

Klicken Sie auf den -Knopf um mit dem Fragebogen zu beginnen.

Wir danken Ihnen für Ihre Unterstützung und freuen uns auf Ihre Antworten.

Herzliche Grüße

Ihre AOK Rheinland/Hamburg

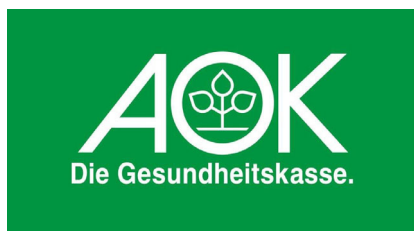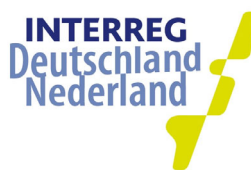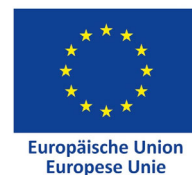

Institute for Health Sciences  
**Radboudumc**

*\*Stichting Katholieke Universiteit, onder dem Namen Radboud universitair medisch centrum (Radboudumc) in Nijmegen*

*\*\* Allgemeine Informationen zur Datenverarbeitung und zu Ihren Rechten finden Sie unter [aok.de/rh/datenschutzrechte](https://www.aok.de/rh/datenschutzrechte) oder <https://www.radboudumc.nl/en/patient-care/rights-and-obligations/privacy>. Bei Fragen wenden Sie sich an die AOK Rheinland/Hamburg, Kasernenstr. 61, 40213 Düsseldorf, oder unseren Datenschutzbeauftragten unter [datenschutz@rh.aok.de](mailto:datenschutz@rh.aok.de).*

## Hinweise zum Ausfüllen des Fragebogens

Der Fragebogen enthält Multiple-Choice-Fragen und offene Fragen. Klicken Sie in den Multiple-Choice-Fragen auf die Antwort, die am besten auf Sie zutrifft. Manchmal sind mehrere Antworten möglich.

Bei den offenen Fragen geben Sie eine Zahl, ein Datum, ein Wort oder einen Satz in ein Textfeld ein.

Versuchen Sie jede Frage zu beantworten, auch wenn Sie sich nicht mehr genau an etwas erinnern können. Am Ende des Fragebogens gibt es Gelegenheit für Ergänzungen und Kommentare.

- Mit dem -Knopf gelangen Sie auf die nächste Seite (unten auf dieser Seite)
- Mit dem -Knopf gehen Sie zurück auf die vorherige Seite (unten auf dieser Seite)
- Mit dem -Knopf können Sie die Antworten auf der Seite löschen.
- Der Fortschrittsbalken  unten auf dieser Seite zeigt an, wie weit Sie mit der Beantwortung des gesamten Fragebogens sind.
- Auf der letzten Seite können Sie Ihre Antworten mit dem -Knopf ausdrucken und / oder als PDF-Datei speichern.
- **Sehr wichtig ist der**  **-Knopf** auf der letzten Seite. Mit diesem Knopf werden Ihre Antworten versendet.

Wenn Sie Fragen haben, kontaktieren Sie uns bitte: [Susanne.Roth@rh.aok.de](mailto:Susanne.Roth@rh.aok.de)

Viel Erfolg beim Ausfüllen des Fragebogens und vielen Dank im Voraus für Ihre Mitarbeit!

# Teil 1: Persönliche Informationen

Ihr Geburtsdatum (TT/MM/JJJJ) (z.B.: 01/02/1956):

Ihre Postleitzahl (zum Beispiel DE-40213):

Ihr Geschlecht:

- weiblich  
 männlich

Ihre Nationalität:

- niederländisch  
 deutsch  
 andere/weitere, nämlich:

Ihre Lebens-/Wohnsituation:

- alleinstehend  
 alleinstehend mit Kindern  
 mit Ehepartnerin/-partner oder Partnerin/Partner  
 mit Ehepartnerin/-partner oder Partnerin/Partner mit Kindern  
 zusammenlebend mit Eltern, Familie oder Verwandten  
 andere, nämlich:

Ihr höchstes Bildungsniveau (der Abschluss der Schul- und Berufsausbildung ist maßgebend):

- Grund-/Sonderschule  
 Hauptschulabschluss  
 Realschulabschluss  
 Gymnasium  
 (Fach-)Hochschulabschluss  
 Ausbildung  
 andere, nämlich:

Ihre berufliche Situation:

- Hausfrau oder Hausmann
- Selbstständigkeit
- Beschäftigter
- arbeitslos
- arbeitsunfähig
- Ruhestand (Rentner bzw. Pensionär)
- andere/weitere, nämlich:

## Teil 2: Fragen zu Ihrer Herzerkrankung

Aufgrund welcher Herzerkrankung/Herzbeschwerden waren Sie zuletzt in Behandlung, z.B. bei einem Internisten bzw. Kardiologen?

- Herzinfarkt
- Brustschmerzen (Angina pectoris)
- weitere, nämlich:

In welchem Jahr/in welchen Jahren waren Sie aufgrund Ihrer Herzerkrankung in Behandlung?

Welche Art der medizinischen Versorgung haben Sie aufgrund der Herzerkrankung erhalten? (Bitte alles Zutreffende ankreuzen.)

- Arzneimittelversorgung
- Angioplastie und / oder Stent-Platzierung
- Bypass
- Herztransplantation
- ambulante Rehabilitation
- stationäre Rehabilitation
- andere/weitere, nämlich:

*Information über Bewegungsprogramme and -angebote bei Herzerkrankungen bzw. abhängig von der Schwere der Herzerkrankung zu Rehabilitationsmöglichkeiten.*

Haben Sie Informationen über die Vorteile von Bewegungsprogrammen und -angeboten nach der Behandlung Ihrer Herzerkrankung bzw. nach einer durchgeführten Rehabilitations-Maßnahme erhalten?

- Ja
- Nein

Von wem haben Sie Informationen erhalten? (Bitte alles Zutreffende ankreuzen)

- von dem niedergelassenen Arzt, z.B. Internist, Kardiologe bzw. im Krankenhaus
- von der Krankenschwester, von dem Krankenpfleger
- aus der Zeitung/dem Internet
- von meinem Krankenversicherer
- von weiteren Personen/Institutionen, nämlich:

Wie würden Sie die Informationen über Möglichkeiten von Maßnahmen und Programmen rund um Ihre Herzgesundheit beurteilen?

sehr schlecht

ungenügend

ausreichend

sehr gut

Wurden Sie über Möglichkeiten der Teilnahme an z.B. Bewegungsprogrammen bzw. -angeboten oder der Rehabilitation (abhängig von der Herzerkrankung) beraten?

Ja

Nein

*Sofern Sie an Maßnahmen (Bewegungsprogrammen, Rehabilitation) teilgenommen haben, machen Sie bitte weitere Angaben zur Einrichtung*

Wie lautet der Name der Einrichtung (z.B. Rehabilitationszentrum, Bewegungseinrichtung)?

Name der Einrichtung:

Ort:

Wie groß was die Entfernung zwischen Ihrem Wohnort und der Einrichtung?

Kilometeranzahl:

Sind Sie dem Rat, der Teilnahme eines Bewegungsprogrammes, -angebotes bzw. der Rehabilitation, gefolgt?

Ja

Nein

## Teil 3: Bisher keine Rehabilitation durchgeführt

*Sie haben angegeben, nicht an Maßnahmen bzw. Programmen rund um Ihre Herzerkrankung, z.B. zu mehr Bewegung bzw. zur Rehabilitation teilgenommen zu haben.*

Allgemeine Gründe:

|                                                                      | nicht<br>zutreffend   | stimme<br>überhaupt<br>nicht zu | stimme<br>eher nicht<br>zu | stimme<br>eher zu     | stimme<br>völlig zu   |
|----------------------------------------------------------------------|-----------------------|---------------------------------|----------------------------|-----------------------|-----------------------|
| Ich hatte keine Lust, an einer Maßnahme/einem Programm teilzunehmen. | <input type="radio"/> | <input type="radio"/>           | <input type="radio"/>      | <input type="radio"/> | <input type="radio"/> |
| Ich hatte keine Zeit.                                                | <input type="radio"/> | <input type="radio"/>           | <input type="radio"/>      | <input type="radio"/> | <input type="radio"/> |
| Die zusätzlichen Kosten (z.B. Fahrkosten) waren mir zu hoch.         | <input type="radio"/> | <input type="radio"/>           | <input type="radio"/>      | <input type="radio"/> | <input type="radio"/> |
| Ich hatte keine Anreis Gelegenheit bzw. keine Transportmöglichkeit.  | <input type="radio"/> | <input type="radio"/>           | <input type="radio"/>      | <input type="radio"/> | <input type="radio"/> |
| Meine berufliche Situation ließ eine Teilnahme nicht zu.             | <input type="radio"/> | <input type="radio"/>           | <input type="radio"/>      | <input type="radio"/> | <input type="radio"/> |

Meine häusliche Situation ließ eine Teilnahme nicht zu.

### Persönliche Gründe:

nicht  
zutreffend

stimme  
überhaupt  
nicht zu

stimme  
eher nicht  
zu

stimme  
eher zu

stimme  
völlig zu

Der Inhalt der Programme und Angebote (Bewegungsangebote,-übungen, Ernährungsberatung, etc.) entsprach nicht meinen Erwartungen.

Ich war der Meinung, dass ich auch ohne weitere Unterstützung wieder gesund werden könnte.

Durch meine Herzprobleme fühlte ich mich nicht stark genug, an den angebotenen Programmen teilzunehmen.

Ich habe regelmäßig Sport gemacht

Durch andere körperliche Probleme konnte ich nicht an Programmen, z.B. zu mehr Bewegung, teilnehmen.

Ich war zu erschöpft und hatte keine Kraft, um an Maßnahmen und Programmen rund um meine Herzerkrankung teilzunehmen.

Ich wollte nicht an mein Herzproblem erinnert werden.

Ich hätte mich nicht wohl gefühlt, wenn ich in einer Gruppe (z.B. in der psychologischen Therapie) über meine Probleme hätte sprechen sollen.

Ich wollte mir nicht die Probleme von anderen Menschen anhören.

Mir nahestehende Personen haben mir von einer Teilnahme abgeraten.

Ich hatte nach der Behandlung (z.B. durch den Internisten, Kardiologen) das Selbstvertrauen, dass ich wie gewohnt - auch ohne zusätzliche Aktivitäten in Maßnahmen (z.B. in Bewegungs- bzw. Ernährungsprogrammen) meinen bisherigen Lebensstil fortsetzen könnte.

### Weitere Gründe:

## Teil 3: Kardiologischen Rehabilitation

*Programm und Maßnahmen rund um die Herzerkrankung.*

Die folgenden Fragen beziehen sich auf die Maßnahmen und Programme, z.B. Teilnahme an Bewegungs-, Ernährungsprogrammen, einer Rehabilitationsmaßnahme, Reha-Sport, an denen Sie teilgenommen haben

Wie lange mussten Sie auf ein Einführungsgespräch/erstes Informationsgespräch warten?

- weniger als zwei Wochen
- zwei bis vier Wochen
- vier bis sechs Wochen
- mehr als sechs Wochen
- Ich erinnere mich nicht mehr.

Wieviel Zeit ist zwischen dem Ende Ihrer kardiologischen Behandlung und dem Beginn der Teilnahme, z.B. in einer Rehabilitationsmaßnahme, Bewegungsprogrammen, Reha-Sport, Unterstützungen ggf. anderer Art (wie beispielsweise psychologischer Hilfe) vergangen?

- weniger als zwei Wochen
- zwei bis vier Wochen
- vier bis sechs Wochen
- mehr als sechs Wochen
- Ich erinnere mich nicht mehr.

Haben Sie die Programme und Rehabilitationsmaßnahmen vollständig abgeschlossen?

- Ja
- Nein

*Sie haben die Programme und Rehabilitationsmaßnahmen vollständig abgeschlossen. Bitte erzählen Sie über Ihre positiven und negativen Erfahrungen.*

Was hat Ihnen gefallen?



Was hat Ihnen nicht gefallen?

Haben Sie das Gefühl, dass Sie während der Programme and Maßnahmen (z.B. Rehabilitationsmaßnahmen) vollständig darüber informiert wurden, wie Sie das Risiko einer Verschlimmerung Ihrer Herzprobleme verringern oder über lange Zeit Ihre Lebenssituation positiv verbessern können?

- Ja  
 Nein

Was haben Sie vermisst?

Sofern sie an Maßnahmen bzw. Programmen teilgenommen haben, haben Sie etwas im Rahmen der Therapien vermisst?

- Ja  
 Nein

Was haben Sie im Rahmen der Therapien vermisst? (Bitte alles Zutreffende ankreuzen)

- Psychologische Hilf/Begleitung  
 Ernährungsberatung  
 Bewegungsberatung  
 Unterstützung, um mit dem Rauchen aufhören zu können.  
 weiteres, nämlich:

## Teil 3: abgebrochene Reha

Sie haben angegeben, dass Sie die Teilnahme an Maßnahmen bzw. einem Programm, abgebrochen haben.

Nach wie vielen **Wochen** haben Sie den Prozess abgebrochen?

Sicherlich haben verschiedene Gründe bei Ihrer Entscheidung eine Rolle gespielt. Bitte geben Sie an, ob Sie den genannten Gründen/Aussagen zustimmen oder nicht zustimmen. Falls andere Gründe eine Rolle gespielt haben, freuen wir uns, wenn Sie diese am Ende der Befragung angeben.

Allgemeine Gründe:

|                                                                                                                                 | nicht<br>zutreffend   | stimme<br>überhaupt<br>nicht zu | stimme<br>eher nicht<br>zu | stimme<br>eher zu     | stimme<br>völlig zu   |
|---------------------------------------------------------------------------------------------------------------------------------|-----------------------|---------------------------------|----------------------------|-----------------------|-----------------------|
| Ich hatte keine Lust mehr teilzunehmen.                                                                                         | <input type="radio"/> | <input type="radio"/>           | <input type="radio"/>      | <input type="radio"/> | <input type="radio"/> |
| Ich hatte keine Zeit.                                                                                                           | <input type="radio"/> | <input type="radio"/>           | <input type="radio"/>      | <input type="radio"/> | <input type="radio"/> |
| Die zusätzlichen Kosten (z.B. Fahrkosten) waren mir zu hoch.                                                                    | <input type="radio"/> | <input type="radio"/>           | <input type="radio"/>      | <input type="radio"/> | <input type="radio"/> |
| Die Einrichtung lag zu weit von meinem Wohnort weg.                                                                             | <input type="radio"/> | <input type="radio"/>           | <input type="radio"/>      | <input type="radio"/> | <input type="radio"/> |
| Ich hatte keine Anreisesegelegenheit bzw. keine Transportmöglichkeit.                                                           | <input type="radio"/> | <input type="radio"/>           | <input type="radio"/>      | <input type="radio"/> | <input type="radio"/> |
| Aufgrund meiner beruflichen Situation war die Teilnahme nicht mehr möglich.                                                     | <input type="radio"/> | <input type="radio"/>           | <input type="radio"/>      | <input type="radio"/> | <input type="radio"/> |
| Aufgrund meiner häuslichen Verpflichtungen (z.B. Pflege einer erkrankten Person) hatte ich keine Möglichkeit mehr teilzunehmen. | <input type="radio"/> | <input type="radio"/>           | <input type="radio"/>      | <input type="radio"/> | <input type="radio"/> |

Persönliche Gründe:

|                                                                                                               | nicht<br>zutreffend   | stimme<br>überhaupt<br>nicht zu | stimme<br>eher nicht<br>zu | stimme<br>eher zu     | stimme<br>völlig zu   |
|---------------------------------------------------------------------------------------------------------------|-----------------------|---------------------------------|----------------------------|-----------------------|-----------------------|
| Der Inhalt der Programme und Angebote (Bewegungsübungen, Ernährung, etc.) entsprach nicht meinen Erwartungen. | <input type="radio"/> | <input type="radio"/>           | <input type="radio"/>      | <input type="radio"/> | <input type="radio"/> |
| Die Intensität der Programme war körperlich zu schwer.                                                        | <input type="radio"/> | <input type="radio"/>           | <input type="radio"/>      | <input type="radio"/> | <input type="radio"/> |
| Die Programme liefen über einen zu langen Zeitraum/dauerten zu lange.                                         | <input type="radio"/> | <input type="radio"/>           | <input type="radio"/>      | <input type="radio"/> | <input type="radio"/> |
| Die Programme und Maßnahmen waren nicht auf meine persönliche Situation abgestimmt.                           | <input type="radio"/> | <input type="radio"/>           | <input type="radio"/>      | <input type="radio"/> | <input type="radio"/> |

Ich war davon überzeugt, ohne unterstützende Programme und Maßnahmen aus eigener Kraft wieder gesund werden zu können.

Durch meine Herzprobleme fühlte ich mich nicht stark genug, um teilzunehmen.

Wegen anderer körperlicher Probleme konnte ich nicht weiter teilnehmen.

Ich war erschöpft und hatte keine Kraft mehr, um weiter teilzunehmen.

Ich wollte nicht an mein Herzproblem erinnert werden.

Ich hätte mich nicht wohl gefühlt, wenn ich in einer Gruppe (z.B. in der psychologischen Therapie) über meine Probleme hätte sprechen sollen.

Ich wollte mir nicht die Probleme von anderen Menschen anhören.

Mir nahestehende Personen haben mir von einer Teilnahme abgeraten.

Ich hatte nach der Behandlung (z.B. durch den Internisten, Kardiologen) das Selbstvertrauen, dass ich wie gewohnt meinen Lebensstil - auch ohne zusätzlichen Aktivitäten (z.B. in Programmen, mit Rehabilitationsmaßnahmen) fortsetzen könnte.

Weitere Gründe:

*Bitte geben Sie kurz an, was Ihre positiven und negativen Erfahrungen waren.*

Was hat Ihnen gefallen?

Was hat Ihnen nicht gefallen?

Haben Sie das Gefühl, dass Sie während der Programme und Maßnahmen vollständig darüber informiert wurden, wie Sie das Risiko einer Verschlimmerung Ihrer Herzprobleme verringern oder über lange Zeit Ihre Lebenssituation positiv verbessern können?

- Ja
- Nein

Was haben Sie vermisst?

Sofern Sie an Maßnahmen bzw. Programmen teilgenommen haben, haben Sie etwas im Rahmen der Therapien vermisst?

- Ja
- Nein

Was haben Sie im Rahmen der Therapien vermisst? (Bitte alles Zutreffende ankreuzen)

- Psychologischen Hilfe/Begleitung
- Ernährungsberatung
- Bewegungsberatung
- Unterstützung, um mit dem Rauchen aufhören zu können.
- weiteres, nämlich:

## Teil 4: Nach der Behandlung bzw. kardiologischen Rehabilitation

*Die Zeit nach der Herzkrankheit bzw. nach der Teilnahme an Programmen oder Maßnahmen rund um die Herzerkrankung*

Nehmen Sie die verordneten Medikamente nach Verordnung Ihres Arztes ein?

- Ja  
 Nein

Was war der Grund für die Änderung/Anpassung Ihrer Medikation? (Bitte alles Zutreffende ankreuzen)

- Ich empfand es nicht mehr als notwendig, Medikamente zu nehmen.  
 Die Einnahme der Medikamente behinderte mich in meiner täglichen Arbeit/ meinen täglichen Verrichtungen.  
 Anderes/ weiteres, nämlich:

Wie viele Minuten in der **Woche** sind Sie körperlich aktiv, z.B. Spaziergänge, Radfahren, Fußball oder andere Sportarten?

- Nicht zutreffend  
 10 Minuten  
 30 Minuten  
 60 Minuten  
 120 Minuten (2 Stunden)  
 150 Minuten (2,5 Stunden)  
 180 Minuten (3 Stunden)  
 240 Minuten (4 Stunden)  
 300 Minuten (5 Stunden) oder mehr

Hier können Sie angeben, was Sie in Bezug auf Ihren Lebensstil nach der Herzerkrankung (und ggf. einer Reha-Maßnahme) geändert haben (bitte alles Zutreffende ankreuzen):

- es hat sich nichts verändert
- besserer Umgang mit Stress
- Physiotherapie
- mehr Bewegung und Sport (z.B. Spaziergänge, Radfahren)
- einem Sport- oder Fitnessclub beigetreten
- eine gesündere Ernährung
- mit dem Rauchen aufgehört
- den Konsum von Alkohol vermindert
- andere Arbeitsstruktur (z.B. weniger arbeiten, mehr Pausen)
- andere/weitere Veränderungen, nämlich:

# Ende des Fragebogens

Möchten Sie noch etwas ergänzen? Bitte nutzen Sie untenstehendes Feld für weitere Ausführungen.

Wenn Sie Ihre eigenen Ergebnisse als PDF speichern oder drucken möchten, können Sie dies jetzt über die Schaltfläche "print" tun. Hinweis: Um Ihre Ergebnisse zu speichern oder auszudrucken, lassen Sie die Popups von dieser Website zu.

**Bitte klicken Sie auf den -Knopf unter dem Fortschrittsbalken, um Ihre Antworten zu versenden.**

Wenn der Fragebogen erfolgreich versendet wurde, werden Sie automatisch auf die Website der AOK weitergeleitet.

Wenn Sie an den Ergebnissen dieses Fragebogens interessiert sind, können Sie Ihre E-Mail-Adresse hinterlassen:

Herzlichen Dank für Ihre Teilnahme an dieser Befragung

Herzliche Grüße

Ihre AOK Rheinland/Hamburg
