# Supplementary material for: Identifying Reasons for Nonattendance and Noncompletion of Cardiac Rehabilitation: INSIGHTS FROM GERMANY AND THE NETHERLANDS
Source: PubMed Central journal article supplement — J Cardiopulm Rehabil Prev. 2021 Mar 26;41(3):153–8. doi: 10.1097/HCR.0000000000000580 (PMC8081445; doi:10.1097/hcr.0000000000000580), 2021-03-26
Supplement: jcprh-41-153-s007.pdf [file jcprh-41-153-s007.pdf]

## **Door Hartpatiënten, Voor Hartpatiënten**

*Hartelijk dank voor uw interesse in ons onderzoek naar factoren die de deelname aan hartrevalidatie kunnen beïnvloeden. Uw antwoorden op de vragen in deze vragenlijst zullen gebruikt worden als belangrijke bouwstenen voor een nog beter revalidatieprogramma voor hartpatiënten dat én de kans op herhaling van hun hartprobleem verkleint én de kwaliteit van leven verbetert!*

# Hart voor samenwerking

Institute for Health Sciences  
**Radboudumc**

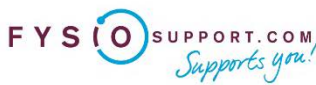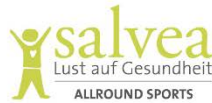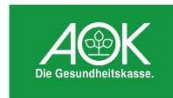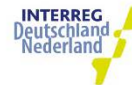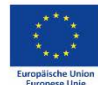

**DEEL 1 (gaat over Uzelf): PERSOONLIJKE INFORMATIE<sup>1</sup>.**

**01. Uw geboortedatum (DD/MM/JJJJ):** \_\_/\_\_/\_\_\_\_

**02. Uw postcode:** \_\_\_\_\_ (bijvoorbeeld 1234 AB)

**03. Uw geslacht:**

- Man
- Vrouw

**04. Uw nationaliteit:**

- Nederlands
- Duits
- Anders namelijk: .....

**05. In welk ziekenhuis bent U behandeld (onder controle) voor Uw hartaandoening?**

- Radboudumc (Nijmegen)
- Maasziekenhuis (Boxmeer)
- Rijnstate (Arnhem)
- Isala Kliniek (Zwolle)
- Anders, namelijk: .....

**06. Uw thuissituatie:**

- Alleenstaand
- Alleenstaand met kinderen
- Met echtgenoot of partner
- Met echtgenoot of partner en kinderen
- Inwonend bij ouders, familie of kennis
- Anders, namelijk: .....

**07. Uw hoogst voltooide schoolopleiding**

- Lager onderwijs
- Lager beroepsonderwijs
- Middelbaar algemeen onderwijs
- Middelbaar beroepsonderwijs
- Hoger beroepsonderwijs
- Universitair onderwijs
- Anders, namelijk: .....

**08. Uw beroepssituatie**

- Huisvrouw dan wel huisman
- Zelfstandige en/of ondernemer
- Werknemer
- Werkeloos
- Arbeidsongeschikt
- Gepensioneerd
- Anders, namelijk: .....

<sup>1</sup> Het is denkbaar dat U de gevraagde gegevens al in een eerder stadium tijdens Uw behandeling heeft gegeven. Toch moeten wij die gegevens wederom aan U vragen. U dient zich daarbij te realiseren dat er lijsten anoniem zijn en Uw antwoorden enkel gebruikt mogen worden voor het doel waarvoor ze gevraagd zijn.

**DEEL 2: BEVAT VRAGEN NAAR AANLEIDING VAN UW HARTAANDOENING**

**09. Voor welke hartziekte bent u bij de cardioloog onder behandeling geweest?**

- Hartinfarct
- Pijn-op-de-borst (angina pectoris)
- Anders, namelijk:.....

**10. In welk jaar was dat?**

.....

**11. Welke behandeling heeft U gehad vanwege hart- en vaatziekten? (meerdere antwoorden zijn mogelijk)**

- Medicatie
- Dotteren en/of stentplaatsing
- Bypass (omleiding)
- Harttransplantatie
- Anders, namelijk:.....

**Hartrevalidatie - informatievoorziening**

**12. Heeft U informatie gekregen over de voordelen van een hartrevalidatietraject?**

- JA
- NEE

**13. Van wie heeft U deze informatie ontvangen? (meerdere antwoorden zijn mogelijk)**

- Cardioloog
- Verpleegkundige
- Anders, namelijk:.....

**14. Hoe zou U de informatievoorziening over de voordelen van hartrevalidatie willen beoordelen?**

| Slecht                   | Onvoldoende              | Voldoende                | Voldoende                |
|--------------------------|--------------------------|--------------------------|--------------------------|
| <input type="checkbox"/> | <input type="checkbox"/> | <input type="checkbox"/> | <input type="checkbox"/> |

**15. Heeft U het advies gekregen om hartrevalidatie te volgen?**

- JA
- NEE, ga door naar vraag 28

**16. Uw hartrevalidatiecentrum:**

Hoe luidt de naam van de locatie waar u hartrevalidatie on volgen? .....

Wat was de afstand in kilometers tussen Uw woning en het revalidatiecentrum? .....km.

**17. Heeft U het advies om hartrevalidatietraject te volgen opgevolgd?**

- JA, ga door naar vraag 18
- NEE

**17.1 U heeft ervoor gekozen om het voorgestelde hartrevalidatietraject niet te volgen.**

Mogelijkerwijs hebben enkele redenen een rol gespeeld in uw besluitvorming om niet mee te doen aan de hartrevalidatie. Hieronder kunt U achter een aantal gepresenteerde redenen de aangeven of U het er niet of wel mee eens bent, of dat de stelling niet van toepassing is. Mochten andere/niet genoemde redenen een rol hebben gespeeld, dan stellen wij het zeer op prijs als U die – aan het einde van deze vraag – wel vermeldt.

| <b>Algemene redenen:</b>                                                                                                    | <b>MEE ONEENS</b>        | <b>↔</b>                 | <b>MEE EENS</b>          | <b>n.v.t.</b>            |
|-----------------------------------------------------------------------------------------------------------------------------|--------------------------|--------------------------|--------------------------|--------------------------|
| Ik had geen zin in hartrevalidatie                                                                                          | <input type="checkbox"/> | <input type="checkbox"/> | <input type="checkbox"/> | <input type="checkbox"/> |
| Geen tijd                                                                                                                   | <input type="checkbox"/> | <input type="checkbox"/> | <input type="checkbox"/> | <input type="checkbox"/> |
| De bijkomende kosten waren te hoog                                                                                          | <input type="checkbox"/> | <input type="checkbox"/> | <input type="checkbox"/> | <input type="checkbox"/> |
| Geen vervoer/transportmogelijkheid                                                                                          | <input type="checkbox"/> | <input type="checkbox"/> | <input type="checkbox"/> | <input type="checkbox"/> |
| Niet mogelijk vanwege werkomstandigheden                                                                                    | <input type="checkbox"/> | <input type="checkbox"/> | <input type="checkbox"/> | <input type="checkbox"/> |
| Mijn thuissituatie liet deelname niet toe                                                                                   | <input type="checkbox"/> | <input type="checkbox"/> | <input type="checkbox"/> | <input type="checkbox"/> |
| <b>Persoonlijke redenen:</b>                                                                                                | <b>MEE ONEENS</b>        | <b>↔</b>                 | <b>MEE EENS</b>          | <b>n.v.t.</b>            |
| De inhoud van het aangeboden traject (sportoefeningen, voedingsadviezen etc.) waren niet zoals verwacht.                    | <input type="checkbox"/> | <input type="checkbox"/> | <input type="checkbox"/> | <input type="checkbox"/> |
| Ik was van mening dat ik zonder begeleiding weer de draad kon oppakken na mijn hartaandoening                               | <input type="checkbox"/> | <input type="checkbox"/> | <input type="checkbox"/> | <input type="checkbox"/> |
| Door mijn hartprobleem voelde ik me niet sterk genoeg om het aangeboden traject aan te gaan.                                | <input type="checkbox"/> | <input type="checkbox"/> | <input type="checkbox"/> | <input type="checkbox"/> |
| Ik sportte al regelmatig                                                                                                    | <input type="checkbox"/> | <input type="checkbox"/> | <input type="checkbox"/> | <input type="checkbox"/> |
| Vanwege andere lichamelijke problemen kon ik niet deelnemen aan het hartrevalidatietraject.                                 | <input type="checkbox"/> | <input type="checkbox"/> | <input type="checkbox"/> | <input type="checkbox"/> |
| Ik was te moe/had geen energie om deel te nemen aan het hartrevalidatietraject.                                             | <input type="checkbox"/> | <input type="checkbox"/> | <input type="checkbox"/> | <input type="checkbox"/> |
| Ik wilde niet herinnerd worden aan mijn hartprobleem.                                                                       | <input type="checkbox"/> | <input type="checkbox"/> | <input type="checkbox"/> | <input type="checkbox"/> |
| Ik voelde me niet op mijn gemak als ik aan een groep mijn probleem moest vertellen (b.v. bij psychologische therapie)       | <input type="checkbox"/> | <input type="checkbox"/> | <input type="checkbox"/> | <input type="checkbox"/> |
| Ik wilde niet andermans problemen aanhoren.                                                                                 | <input type="checkbox"/> | <input type="checkbox"/> | <input type="checkbox"/> | <input type="checkbox"/> |
| Deelname werd afgeraden door mensen uit mijn omgeving                                                                       | <input type="checkbox"/> | <input type="checkbox"/> | <input type="checkbox"/> | <input type="checkbox"/> |
| Ik had na de behandeling (bij de cardioloog) het vertrouwen dat ik mijn leven gewoon weer kon oppakken zonder extra traject | <input type="checkbox"/> | <input type="checkbox"/> | <input type="checkbox"/> | <input type="checkbox"/> |

**Andere redenen:**

.....

.....

.....

**U kunt nu doorgaan naar vraag 28**

**Hartrevalidatie programma. De volgende vragen hebben betrekking op het hartrevalidatieprogramma dat U gevolgd heeft.**

**18. Hoe lang heeft U moeten wachten op het intakegesprek?**

- Minder dan 2 weken
- 2 tot 4 weken
- 4 tot 6 weken
- Meer dan 6 weken
- Weet ik niet meer

**19. Hoeveel weken zat er tussen het intakegesprek en het momenteel dat U kon deelnemen aan het hartrevalidatietraject (beweegprogramma)?**

- Minder dan 2 weken
- 2 tot 4 weken
- 4 tot 6 weken
- Meer dan 6 weken
- Weet ik niet meer

**20. Heeft u het voorgestelde hartrevalidatietraject volledig afgerond?**

- JA
- NEE, ga door naar vraag 24

**21. U heeft het voorgestelde hartrevalidatietraject volledig afgerond. Graag zouden wij U willen vragen wat de positieve en negatieve ervaringen van U waren met de hartrevalidatie.**

Wat waren positieve punten van het hartrevalidatietraject?

.....  
.....  
.....

Wat waren negatieve punten van het hartrevalidatietraject?

.....  
.....  
.....

**22. Heeft U het gevoel dat u tijdens de hartrevalidatie voldoende informatie heeft ontvangen wat U kunt doen om het risico op hart- en vaatziekten zo laag mogelijk te houden?**

- JA
- NEE, wat heeft u gemist?: .....

**23. Heeft U het in het gevolgde hartrevalidatieprogramma zaken/therapieën gemist?**

- JA, welke? (meerdere antwoorden zijn mogelijk):
  - Psychologische hulp/begeleiding
  - Voedingsadviezen
  - Beweegadviezen
  - Hulp bij stoppen met roken
  - Anders, namelijk:.....
- NEE

**24. U heeft aangegeven te zijn gestopt met het voorgestelde hartrevalidatietraject. Na hoeveel weken bent u met het hartrevalidatietraject gestopt?**

Aantal weken.....

**25. U heeft aangegeven te zijn gestopt met het hartrevalidatietraject.**

Mogelijkerwijs hebben enkele redenen een rol gespeeld in uw besluitvorming om te stoppen met hartrevalidatie. Hieronder kunt U achter een aantal gepresenteerde redenen de aangeven of U het er niet of wel mee eens bent, of dat de stelling niet van toepassing is. Mochten andere/niet genoemde redenen een rol hebben gespeeld, dan stellen wij het zeer op prijs als U die – aan het einde van deze vraag – wel vermeldt.

| <b>Algemene redenen:</b>                                                                                                                                      | <b>MEE ONEENS</b>        | <b>↔</b>                 | <b>MEE EENS</b>          | <b>N.V.T.</b>            |
|---------------------------------------------------------------------------------------------------------------------------------------------------------------|--------------------------|--------------------------|--------------------------|--------------------------|
| Geen zin meer in hartrevalidatie                                                                                                                              | <input type="checkbox"/> | <input type="checkbox"/> | <input type="checkbox"/> | <input type="checkbox"/> |
| Geen tijd                                                                                                                                                     | <input type="checkbox"/> | <input type="checkbox"/> | <input type="checkbox"/> | <input type="checkbox"/> |
| De bijkomende kosten waren te hoog                                                                                                                            | <input type="checkbox"/> | <input type="checkbox"/> | <input type="checkbox"/> | <input type="checkbox"/> |
| Het revalidatiecentrum lag te ver weg                                                                                                                         | <input type="checkbox"/> | <input type="checkbox"/> | <input type="checkbox"/> | <input type="checkbox"/> |
| Geen vervoers- of transportmogelijkheden                                                                                                                      | <input type="checkbox"/> | <input type="checkbox"/> | <input type="checkbox"/> | <input type="checkbox"/> |
| Vanwege werkomstandigheden kon ik niet deelnemen aan het hartrevalidatietraject                                                                               | <input type="checkbox"/> | <input type="checkbox"/> | <input type="checkbox"/> | <input type="checkbox"/> |
| Vanwege verplichtingen in de thuissituatie (bijvoorbeeld huishoudelijke taken) was ik niet in de gelegenheid om deel te nemen aan het hartrevalidatietraject. | <input type="checkbox"/> | <input type="checkbox"/> | <input type="checkbox"/> | <input type="checkbox"/> |
| <b>Persoonlijke redenen:</b>                                                                                                                                  | <b>MEE ONEENS</b>        | <b>↔</b>                 | <b>MEE EENS</b>          | <b>N.V.T.</b>            |
| De inhoud van het aangeboden traject (sportoefeningen, voedingsadviezen, etc.) was niet conform verwachting                                                   | <input type="checkbox"/> | <input type="checkbox"/> | <input type="checkbox"/> | <input type="checkbox"/> |
| De intensiteit van het hartrevalidatietraject was lichamelijk te zwaar                                                                                        | <input type="checkbox"/> | <input type="checkbox"/> | <input type="checkbox"/> | <input type="checkbox"/> |
| Het hartrevalidatietraject duurde te lang                                                                                                                     | <input type="checkbox"/> | <input type="checkbox"/> | <input type="checkbox"/> | <input type="checkbox"/> |
| Het hartrevalidatietraject was niet aangepast naar mijn persoonlijke situatie                                                                                 | <input type="checkbox"/> | <input type="checkbox"/> | <input type="checkbox"/> | <input type="checkbox"/> |
| Ik was ervan overtuigd dat ik geen hartrevalidatie nodig had en op eigen kracht gezond kon worden                                                             | <input type="checkbox"/> | <input type="checkbox"/> | <input type="checkbox"/> | <input type="checkbox"/> |
| Vanwege mijn hartprobleem, voelde ik me niet sterk genoeg om verder deel te nemen aan het hartrevalidatietraject                                              | <input type="checkbox"/> | <input type="checkbox"/> | <input type="checkbox"/> | <input type="checkbox"/> |
| Vanwege andere lichamelijke problemen kon ik niet verder deelnemen aan een hartrevalidatietraject                                                             | <input type="checkbox"/> | <input type="checkbox"/> | <input type="checkbox"/> | <input type="checkbox"/> |
| Ik was te moe en had geen energie om verder deel te nemen aan een hartrevalidatietraject                                                                      | <input type="checkbox"/> | <input type="checkbox"/> | <input type="checkbox"/> | <input type="checkbox"/> |
| Ik wilde niet herinnerd worden aan mijn hartprobleem                                                                                                          | <input type="checkbox"/> | <input type="checkbox"/> | <input type="checkbox"/> | <input type="checkbox"/> |
| Ik voelde me niet comfortabel wanneer ik aan een groep mijn verhaal moest vertellen (bijvoorbeeld tijdens psychologische therapie)                            | <input type="checkbox"/> | <input type="checkbox"/> | <input type="checkbox"/> | <input type="checkbox"/> |
| Ik wilde niet andermans problemen aanhoren                                                                                                                    | <input type="checkbox"/> | <input type="checkbox"/> | <input type="checkbox"/> | <input type="checkbox"/> |
| Deelname werd afgeraden door mensen uit mijn omgeving                                                                                                         | <input type="checkbox"/> | <input type="checkbox"/> | <input type="checkbox"/> | <input type="checkbox"/> |
| Ik had na de behandeling (bij de cardioloog) het vertrouwen dat ik mijn leven gewoon weer kon oppakken zonder extra traject                                   | <input type="checkbox"/> | <input type="checkbox"/> | <input type="checkbox"/> | <input type="checkbox"/> |

**Andere redenen:**

.....  
.....  
.....

**25.1 U heeft aangegeven te zijn gestopt met het hartrevalidatietraject. Graag zouden wij U willen vragen wat de positieve en negatieve ervaringen van U waren met de hartrevalidatie.**

Wat waren positieve punten van het hartrevalidatietraject?

.....  
.....  
.....

Wat waren negatieve punten van het hartrevalidatietraject?

.....  
.....  
.....

**26. Heeft U het gevoel dat u tijdens de hartrevalidatie voldoende informatie heeft ontvangen wat U kunt doen om het risico op hart- en vaatziekten zo laag mogelijk te houden?**

- JA
- NEE, wat heeft u gemist?: .....

**27. Heeft U het in het gevolgde hartrevalidatieprogramma zaken/therapieën gemist?**

- JA, welke? (meerdere antwoorden zijn mogelijk):
  - Psychologische hulp/begeleiding
  - Voedingsadviezen
  - Beweegadviezen
  - Hulp bij stoppen met roken
  - Anders, namelijk:.....
- NEE



## De periode na de hartziekte/hartrevalidatie

### 28. Neemt U de voorgeschreven medicatie volgens het doktersrecept in?

- JA, ga door naar vraag 30
- NEE, wat is er veranderd?:.....

### 29. Wat was de reden voor de wijziging in Uw medicatiegebruik? (meerdere antwoorden zijn mogelijk)

- Voelde niet meer de noodzaak om medicatie te nemen
- Medicatiegebruik belemmerde mij in mijn dagelijks functioneren
- Anders, namelijk.....

### 30. Hoeveel minuten in de week bent u lichamelijk actief, bijvoorbeeld wandelen, fietsen, voetballen, of andere sporten?

- Niet van toepassing
- 10 minuten
- 30 minuten
- 60 minuten
- 120 minuten (2 uur)
- 150 minuten (2,5 uur)
- 180 minuten (3 uur)
- 240 minuten (4 uur)
- 300 minuten (5 uur) of meer

### 31. Hieronder kunt U aangeven welke aanpassingen U heeft gedaan qua leefstijl na de hartziekte en hartrevalidatie (meerdere antwoorden zijn mogelijk):

- Er is niets veranderd
- Anders leren omgaan met stress
- Therapie volgen bij de fysiotherapeut
- Meer gaan bewegen of sporten (bijvoorbeeld wandelen, fietsen)
- Lid geworden van een sport- of fitnessclub
- Beter op eetpatroon gaan letten
- Gestopt met roken
- Het drinken van alcoholische dranken verminderd
- Ander werkpatroon (bijvoorbeeld minder gaan werken)
- Iets anders.....

**Hartelijk dank voor uw deelname aan deze vragenlijst.**
